# Supplementary material
Source: MDPI journal article supplement (https://www.mdpi.com/2073-4441/12/8/2144)
Supplement: s1 [file s1]

**Table S1.** Questions of the structured interviews.

| Question number | Question                                                                                                                                                                                                                                        |
|-----------------|-------------------------------------------------------------------------------------------------------------------------------------------------------------------------------------------------------------------------------------------------|
| 1.              | Please, specify your profession and place of work, then describe your relation to the fishpond system in question.                                                                                                                              |
| 2.              | Please, take a look into our list of ecosystem services and based on your knowledge, select those that are provided by the fishpond system in question (only select those ecosystem services that you have already known before the interview). |
| 3.              | Do you know any other form of ecosystem service that is currently provided by the fishpond system in question however, it was not on our list?                                                                                                  |
| 4.              | From your previous choices, please highlight those ecosystem services that are important for your stakeholder group. Please, explain your choices if it is possible.                                                                            |
| 5.              | Do you know any impacts or interactions (positive or negative) related to the ecosystem services you were selected in question 2? If you do, could you please explain them?                                                                     |

**Table S2.** Revealed ESs of the fishpond systems.

| <b>Ecosystem services</b>                 | <b>Descriptions</b>                                                                                                                        |
|-------------------------------------------|--------------------------------------------------------------------------------------------------------------------------------------------|
| Fish production                           | fish, produced by fish farms                                                                                                               |
| Reed production                           | reed (as raw material), harvested from the area of the fishpond systems                                                                    |
| Feed for grazing livestock                | natural sources of feed (hay, reed, etc.), provided for livestock grazing on the banks                                                     |
| Firewood                                  | firewood, provided by woody vegetations                                                                                                    |
| Microclimate regulation                   | ability of the fishpond systems to puffer the effects of extreme temperature changes locally                                               |
| Carbon sequestration and storage          | ability of the fishpond systems' aquatic and terrestrial vegetation to absorb and store CO <sub>2</sub> from the air in the form of carbon |
| Air quality regulation                    | ability of the fishpond systems to absorb polluting materials (dust, etc.) from air                                                        |
| Water quality regulation                  | ability of the fishpond systems to regulate the level of organic and inorganic materials in the water (nitrate, nitrite etc.)              |
| Water storage                             | stored water of the fishponds that could be used alternatively in the case of extreme droughts                                             |
| Opportunity for water retention           | ability of the fishpond systems to store unnecessary waters of surface runoffs in the case of extreme precipitation levels                 |
| Groundwater recharge                      | ability of the fishpond systems' canals to provide groundwater for the surrounding areas                                                   |
| Aesthetics                                | spectacular views and landscape units, that visitors could experience                                                                      |
| Cultural heritage/Inspirational source    | ability of the fishpond systems to raise the level of cultural heritage by giving inspirational sources to artists and visitors            |
| Opportunities for scientific research     | ability of the fishpond system to provide opportunities for the implementation of scientific researches                                    |
| Opportunities for environmental education | ability of the fishpond system to provide opportunities for educational activities                                                         |
| Recreation                                | different forms of recreational activities provided by the fishpond systems (hiking, hunting, etc.)                                        |

**Table S3.** Number of times when the listed ESs were highlighted by the key-informants of the selected fishpond systems.

| Ecosystem services                        | Number of highlights per fishpond systems |           |        |     |
|-------------------------------------------|-------------------------------------------|-----------|--------|-----|
|                                           | Akasztó                                   | Biharugra | Szeged | SUM |
| Fish production                           | 3                                         | 12        | 7      | 22  |
| Reed production                           | 0                                         | 9         | 4      | 13  |
| Feed for grazing livestock                | 2                                         | 0         | 0      | 2   |
| Firewood                                  | 1                                         | 0         | 0      | 1   |
| Microclimate regulation                   | 2                                         | 0         | 6      | 8   |
| Carbon sequestration and storage          | 0                                         | 8         | 2      | 10  |
| Air quality regulation                    | 0                                         | 10        | 0      | 10  |
| Water quality regulation                  | 1                                         | 8         | 3      | 12  |
| Water storage                             | 0                                         | 4         | 5      | 9   |
| Opportunity for water retention           | 0                                         | 0         | 3      | 3   |
| Groudwater recharge                       | 0                                         | 7         | 0      | 7   |
| Aesthetics                                | 0                                         | 11        | 0      | 11  |
| Cultural heritage/Inspirational source    | 2                                         | 9         | 6      | 17  |
| Opportunities for scientific research     | 1                                         | 5         | 6      | 12  |
| Opportunities for environmental education | 1                                         | 10        | 5      | 16  |
| Recreation                                | 3                                         | 11        | 7      | 21  |

**Table S4.** Mean mentioning values of the main ES categories; FF—fish farming; NC—nature conservation; WM—water management; T—tourism (SD: Standard deviation).

| ES categories                  | Biharugra        |                 |    |                  |                  | Szeged           |                  |                  |                  |                  | Akasztó          |                  |    |   |                  |
|--------------------------------|------------------|-----------------|----|------------------|------------------|------------------|------------------|------------------|------------------|------------------|------------------|------------------|----|---|------------------|
|                                | FF               | NC              | WM | T                | SUM              | FF               | NC               | WM               | T                | SUM              | FF               | NC               | WM | T | SUM              |
| Provisioning ESs               | 2.5<br>±3 SD     | 1.25<br>±1.5 SD | 0  | 1.5<br>±1.73 SD  | 5.25<br>±6.18 SD | 0.5<br>±0.57 SD  | 1.25<br>±1.5 SD  | 0.75<br>±0.96 SD | 0.25<br>±0.5 SD  | 2.75<br>±3.4 SD  | 1<br>±0.82 SD    | 0.5<br>±0.58 SD  | 0  | 0 | 1.5<br>±1.29 SD  |
| Regulating and maintaining ESs | 2.71<br>±2.06 SD | 1±0.82<br>SD    | 0  | 1.57<br>±1.40 SD | 5.29<br>±4.03 SD | 0.71<br>±0.48 SD | 1.14<br>±1.21 SD | 0.71<br>±0.95 SD | 0.14<br>±0.38 SD | 2.71<br>±2.29 SD | 0.29<br>±0.49 SD | 0.14<br>±0.38 SD | 0  | 0 | 0.43<br>±0.79 SD |
| Cultural ESs                   | 4<br>±1.7 SD     | 3<br>±0 SD      | 0  | 2.2<br>±0.84 SD  | 9.2<br>±2.49 SD  | 0.6<br>±0.55 SD  | 2.4<br>±1.34 SD  | 1.4<br>±0.89 SD  | 0.4<br>±0.55 SD  | 4.8<br>±2.77 SD  | 1<br>±0.71 SD    | 0.4<br>±0.55 SD  | 0  | 0 | 1.4<br>±1.14 SD  |

**Table S5.** Mean importance values of the main ES categories; FF—fish farming; NC—nature conservation; WM—water management; T—tourism (SD: Standard deviation).

| ES categories                  | Biharugra        |                  |    |                  |                  | Szeged          |               |                  |                 |                  | Akasztó          |                  |    |   |                  |
|--------------------------------|------------------|------------------|----|------------------|------------------|-----------------|---------------|------------------|-----------------|------------------|------------------|------------------|----|---|------------------|
|                                | FF               | NC               | WM | T                | SUM              | FF              | NC            | WM               | T               | SUM              | FF               | NC               | WM | T | SUM              |
| Provisioning ESs               | 1.5<br>±2.38 SD  | 0                | 0  | 0.5<br>±1 SD     | 2<br>±3.37 SD    | 0.5<br>±0.58 SD | 1<br>±1.15 SD | 0                | 0.25<br>±0.5 SD | 1.75<br>±2.06 SD | 1<br>±0.82 SD    | 0.25<br>±0.58 SD | 0  | 0 | 1.25<br>±0.96 SD |
| Regulating and maintaining ESs | 0.29<br>±0.76 SD | 0.71<br>±0.95 SD | 0  | 0.86<br>±1.21 SD | 1.86<br>±1.86 SD | 0               | 0             | 0.29<br>±0.76 SD | 0               | 0.29<br>±0.76 SD | 0.14<br>±0.38 SD | 0                | 0  | 0 | 0.14<br>±0.38 SD |
| Cultural ESs                   | 0.2<br>±0.45 SD  | 1.6<br>±1.34 SD  | 0  | 1<br>±1.41 SD    | 2.8<br>±2.05 SD  | 0.2<br>±0.45 SD | 2<br>±1.22 SD | 0                | 0.4<br>±0.55 SD | 2.6<br>±1.82 SD  | 0.6<br>±0.55 SD  | 0.4<br>±0.55 SD  | 0  | 0 | 1<br>±1 SD       |

**Table S6.** Revealed positive impacts related to the listed ESs with the number of times when they were mentioned by the members of each stakeholder sectors of the selected fishpond systems; FF—fish farming; NC—nature conservation; WM—water management; T—tourism.

| Interactions                                                                             | Biharugra |    |    |   |     | Szeged |    |    |   |     | Akasztó |    |    |   |     |
|------------------------------------------------------------------------------------------|-----------|----|----|---|-----|--------|----|----|---|-----|---------|----|----|---|-----|
|                                                                                          | FF        | NC | WM | T | SUM | FF     | NC | WM | T | SUM | FF      | NC | WM | T | SUM |
| Fish farming activity is the base of every other ES in the list                          | 5         | 2  | 0  | 3 | 10  | 1      | 3  | 0  | 0 | 4   | 0       | 2  | 0  | 0 | 2   |
| Fish production positively affects biodiversity                                          | 5         | 0  | 0  | 0 | 5   | 1      | 2  | 0  | 0 | 3   | 0       | 1  | 0  | 0 | 1   |
| Fish production creates opportunities for recreational activities                        | 0         | 0  | 0  | 0 | 0   | 0      | 0  | 0  | 0 | 0   | 1       | 0  | 0  | 0 | 1   |
| Fish production positively affects carbon sequestration and storage through biodiversity | 0         | 0  | 0  | 0 | 1   | 0      | 0  | 0  | 0 | 0   | 0       | 0  | 0  | 0 | 0   |
| Fish production positively affects microclimate regulation                               | 0         | 0  | 0  | 0 | 0   | 0      | 1  | 0  | 0 | 1   | 0       | 0  | 0  | 0 | 0   |
| Biodiversity positively affects carbon sequestration and storage                         | 0         | 1  | 0  | 0 | 1   | 0      | 0  | 0  | 0 | 0   | 0       | 0  | 0  | 0 | 0   |
| Biodiversity positively affects reed production                                          | 0         | 1  | 0  | 0 | 1   | 0      | 0  | 0  | 0 | 0   | 0       | 0  | 0  | 0 | 0   |
| Biodiversity positively affects fish production                                          | 6         | 0  | 0  | 0 | 6   | 1      | 0  | 0  | 0 | 1   | 2       | 0  | 0  | 0 | 2   |
| Biodiversity positively affects water quality regulation                                 | 4         | 1  | 0  | 0 | 5   | 0      | 2  | 1  | 0 | 3   | 1       | 0  | 0  | 0 | 0   |
| Biodiversity positively affects recreational activities                                  | 2         | 2  | 0  | 1 | 5   | 0      | 1  | 0  | 0 | 1   | 0       | 1  | 0  | 0 | 0   |

Table S6. Cont.

| Interactions                                                            | Biharugra |    |    |   |     | Szeged |    |    |   |     | Akasztó |    |    |   |     |
|-------------------------------------------------------------------------|-----------|----|----|---|-----|--------|----|----|---|-----|---------|----|----|---|-----|
|                                                                         | FF        | NC | WM | T | SUM | FF     | NC | WM | T | SUM | FF      | NC | WM | T | SUM |
| Recreation positively affects opportunities for environmental education | 0         | 0  | 0  | 0 | 0   | 0      | 2  | 0  | 0 | 2   | 0       | 0  | 0  | 0 | 0   |
| Recreation positively affects opportunities for scientific research     | 0         | 0  | 0  | 0 | 0   | 0      | 2  | 0  | 0 | 2   | 0       | 0  | 0  | 0 | 0   |
| Water storage positively affects microclimate regulation                | 0         | 0  | 0  | 0 | 0   | 0      | 1  | 0  | 0 | 1   | 0       | 0  | 0  | 0 | 0   |
| Grazing positively affects biodiversity                                 | 0         | 0  | 0  | 0 | 0   | 0      | 0  | 0  | 0 | 0   | 0       | 1  | 0  | 0 | 1   |

**Table S7.** Revealed negative impacts related to the listed ESs with the number of times when they were mentioned by the members of each stakeholder sectors of the selected fishpond systems; FF—fish farming; NC—nature conservation; WM—water management; T—tourism.

| Interactions                                                                                         | Biharugra |    |    |   |     | Szeged |    |    |   |     | Akasztó |    |    |   |     |
|------------------------------------------------------------------------------------------------------|-----------|----|----|---|-----|--------|----|----|---|-----|---------|----|----|---|-----|
|                                                                                                      | FF        | NC | WM | T | SUM | FF     | NC | WM | T | SUM | FF      | NC | WM | T | SUM |
| Biodiversity negatively affects fish production through fish eating bird species                     | 6         | 0  | 0  | 0 | 6   | 1      | 0  | 0  | 0 | 1   | 2       | 0  | 0  | 0 | 2   |
| Reed production negatively affects biodiversity                                                      | 0         | 1  | 0  | 0 | 1   | 0      | 2  | 0  | 0 | 2   | 0       | 0  | 0  | 0 | 0   |
| Reed production negatively affects opportunities for scientific research in the case of biodiversity | 0         | 0  | 0  | 0 | 0   | 0      | 1  | 0  | 0 | 1   | 0       | 0  | 0  | 0 | 0   |
| Recreation negatively affects biodiversity                                                           | 0         | 0  | 0  | 0 | 0   | 0      | 1  | 0  | 0 | 1   | 0       | 0  | 0  | 0 | 0   |
| Recreation negatively affects fish production                                                        | 0         | 0  | 0  | 0 | 0   | 0      | 1  | 0  | 0 | 1   | 0       | 0  | 0  | 0 | 0   |
